# Supplementary material for: Chondrule-like objects and Ca-Al-rich inclusions in Ryugu may potentially be the oldest Solar System materials
Source: PubMed Central journal article supplement (PMC9935534; doi:10.1038/s41467-023-36268-8), 2023-02-16
Supplement: 41467_2023_36268_MOESM2_ESM.pdf [file 41467_2023_36268_MOESM2_ESM.pdf]

Supplementary Table 1: Major element compositions of chondrule-like objects and CAIs in the Ryugu samples measured with FE-EPMA<sup>a</sup> and TEM<sup>b</sup>

| Sample name     | Analysis # <sup>c</sup> | Target | SiO <sub>2</sub> | TiO <sub>2</sub> | Al <sub>2</sub> O <sub>3</sub> | Cr <sub>2</sub> O <sub>3</sub> | FeO    | MnO   | MgO    | CaO    | Na <sub>2</sub> O | NiO   | K <sub>2</sub> O | SO <sub>3</sub> | P <sub>2</sub> O <sub>5</sub> | Total  | Mg#   |
|-----------------|-------------------------|--------|------------------|------------------|--------------------------------|--------------------------------|--------|-------|--------|--------|-------------------|-------|------------------|-----------------|-------------------------------|--------|-------|
| C0002-P5-C1-Chd | 1499                    | Ol     | 42.390           | 0.022            | 0.052                          | 0.592                          | 1.560  | 0.413 | 56.240 | 0.182  | 0.039             | 0.090 | n.m.             | n.m.            | n.m.                          | 101.58 | 98.5  |
|                 | 1500                    | Ol     | 42.900           | 0.012            | 0.011                          | 0.682                          | 1.450  | 1.510 | 55.680 | 0.164  | 0.051             | 0.091 | n.m.             | n.m.            | n.m.                          | 102.55 | 98.6  |
|                 | 1501                    | Ol     | 42.400           | 0.038            | 0.042                          | 0.549                          | 1.350  | 0.320 | 55.790 | 0.191  | 0.051             | 0.076 | n.m.             | n.m.            | n.m.                          | 100.80 | 98.7  |
| C0002-P5-C2-Chd | 1476                    | Ol     | 42.660           | 0.000            | 0.020                          | 0.276                          | 1.169  | 0.472 | 58.020 | 0.020  | 0.014             | 0.132 | n.m.             | n.m.            | n.m.                          | 102.79 | 98.9  |
|                 | 1477                    | Ol     | 41.090           | 0.004            | 0.012                          | 0.301                          | 1.290  | 0.484 | 56.110 | 0.018  | 0.001             | 0.085 | n.m.             | n.m.            | n.m.                          | 99.39  | 98.7  |
|                 | 2496                    | Ol     | 46.990           | 0.020            | 0.094                          | 0.328                          | 1.155  | 0.464 | 46.590 | 3.030  | 0.021             | 0.124 | n.m.             | n.m.            | n.m.                          | 98.82  | 98.6  |
| C0040-02-Chd    | TEM-1                   | Ol     | 41.636           | 0.170            | 0.000                          | 0.448                          | 0.424  | 1.005 | 56.129 | 0.132  | 0.000             | 0.000 | 0.056            | n.m.            | n.m.                          | 100.00 | 99.6  |
|                 | TEM-2                   | Ol     | 42.171           | 0.000            | 0.000                          | 0.535                          | 0.253  | 0.916 | 55.994 | 0.131  | 0.000             | 0.000 | 0.000            | n.m.            | n.m.                          | 100.00 | 99.7  |
|                 | TEM-3                   | Ol     | 42.311           | 0.000            | 0.000                          | 0.181                          | 0.000  | 0.761 | 56.748 | 0.000  | 0.000             | 0.000 | 0.000            | n.m.            | n.m.                          | 100.00 | 100.0 |
|                 | TEM-4                   | Ol     | 42.487           | 0.180            | 0.000                          | 0.269                          | 0.509  | 0.502 | 55.941 | 0.066  | 0.000             | 0.000 | 0.056            | n.m.            | n.m.                          | 100.00 | 99.5  |
|                 | TEM-5                   | Ol     | 41.975           | 0.085            | 0.000                          | 0.361                          | 0.341  | 0.843 | 56.394 | 0.000  | 0.000             | 0.000 | 0.000            | n.m.            | n.m.                          | 100.00 | 99.7  |
|                 | TEM-6                   | Di     | 55.217           | 0.230            | 0.094                          | 0.263                          | 0.026  | 0.207 | 20.992 | 22.919 | 0.000             | 0.000 | 0.060            | n.m.            | n.m.                          | 100.00 | 99.9  |
|                 | TEM-7                   | Di     | 55.260           | 0.000            | 0.397                          | 0.000                          | 0.270  | 0.013 | 20.942 | 23.283 | 0.000             | 0.000 | 0.000            | n.m.            | n.m.                          | 100.16 | 99.3  |
|                 | TEM-8                   | Di     | 56.522           | 0.030            | 0.019                          | 0.190                          | 0.180  | 0.000 | 20.892 | 22.163 | 0.000             | 0.000 | 0.000            | n.m.            | n.m.                          | 100.00 | 99.5  |
|                 | TEM-9                   | Di     | 56.108           | 0.000            | 0.298                          | 0.355                          | 0.084  | 0.166 | 20.994 | 21.994 | 0.000             | 0.000 | 0.000            | n.m.            | n.m.                          | 100.00 | 99.8  |
|                 | TEM-10                  | Di     | 55.102           | 0.370            | 0.178                          | 0.000                          | 0.167  | 0.082 | 20.646 | 23.436 | 0.000             | 0.000 | 0.055            | n.m.            | n.m.                          | 100.00 | 99.6  |
| C0040-02-CAI    | 2482                    | Sp     | 0.091            | 0.931            | 73.670                         | 0.093                          | 0.816  | 0.000 | 24.340 | 1.249  | 0.000             | 0.058 | n.m.             | n.m.            | n.m.                          | 101.25 |       |
|                 | 2483                    | Sp     | 0.058            | 0.768            | 73.620                         | 0.110                          | 0.853  | 0.000 | 24.860 | 1.149  | 0.004             | 0.067 | n.m.             | n.m.            | n.m.                          | 101.49 |       |
|                 | 2484                    | Hib    | 0.162            | 5.500            | 80.230                         | 0.067                          | 0.855  | 0.008 | 7.100  | 6.760  | 0.001             | 0.000 | n.m.             | n.m.            | n.m.                          | 100.68 |       |
|                 | 2485                    | Hib    | 0.233            | 5.050            | 79.280                         | 0.109                          | 0.761  | 0.019 | 9.310  | 6.050  | 0.008             | 0.071 | n.m.             | n.m.            | n.m.                          | 100.89 |       |
|                 | 2486                    | Sp     | 0.348            | 0.035            | 71.540                         | 0.141                          | 0.892  | 0.000 | 27.720 | 0.014  | 0.002             | 0.047 | n.m.             | n.m.            | n.m.                          | 100.74 |       |
|                 | 2487                    | Sp     | 1.288            | 0.232            | 67.800                         | 0.121                          | 1.029  | 0.000 | 27.550 | 0.110  | 0.018             | 0.031 | n.m.             | n.m.            | n.m.                          | 98.18  |       |
|                 | 2811                    | Phyl   | 19.733           | 0.088            | 16.106                         | 1.003                          | 12.082 | 0.207 | 28.914 | 0.111  | 0.362             | 0.286 | 0.033            | 5.627           | 0.289                         | 84.84  |       |
|                 | 2812                    | Phyl   | 18.538           | 0.083            | 17.751                         | 0.329                          | 6.685  | 0.311 | 28.183 | 0.071  | 0.101             | 0.053 | 0.002            | 5.426           | 0.418                         | 77.95  |       |
|                 | 2813                    | Phyl   | 19.270           | 0.060            | 17.221                         | 0.907                          | 10.032 | 0.243 | 30.197 | 0.188  | 0.319             | 0.294 | 0.012            | 4.976           | 0.217                         | 83.94  |       |
|                 | 2814                    | Phyl   | 21.556           | 0.131            | 15.134                         | 0.479                          | 8.752  | 0.291 | 28.347 | 0.075  | 0.147             | 0.149 | 0.037            | 5.309           | 0.354                         | 80.76  |       |
|                 | 2815                    | Phyl   | 21.545           | 0.085            | 14.083                         | 1.619                          | 13.780 | 0.203 | 24.837 | 0.231  | 0.671             | 0.577 | 0.037            | 4.107           | 0.112                         | 81.89  |       |
|                 | 5845                    | Sp     | 0.210            | 0.172            | 70.420                         | 0.154                          | 0.712  | 0.000 | 28.440 | 0.020  | 0.000             | 0.073 | n.m.             | n.m.            | n.m.                          | 100.20 |       |
|                 | 5846                    | Sp     | 0.500            | 0.191            | 70.470                         | 0.149                          | 0.676  | 0.002 | 28.430 | 0.016  | 0.002             | 0.023 | n.m.             | n.m.            | n.m.                          | 100.46 |       |
|                 | 5847                    | Sp     | 0.758            | 0.235            | 69.610                         | 0.151                          | 0.697  | 0.009 | 27.740 | 0.008  | 0.009             | 0.000 | n.m.             | n.m.            | n.m.                          | 99.22  |       |
|                 | 5848                    | Sp     | 0.525            | 0.175            | 71.340                         | 0.145                          | 0.707  | 0.008 | 28.700 | 0.005  | 0.007             | 0.050 | n.m.             | n.m.            | n.m.                          | 101.66 |       |
| C0076-10-CAI    | 5995                    | Phyl   | 35.573           | 0.097            | 21.736                         | 0.435                          | 5.463  | 0.070 | 27.765 | 0.263  | 0.109             | 0.381 | 0.001            | 0.898           | 0.075                         | 92.87  |       |
|                 | 5996                    | Phyl   | 44.318           | 0.104            | 7.891                          | 0.474                          | 5.654  | 0.148 | 22.368 | 0.127  | 0.232             | 0.543 | 0.030            | 1.027           | 0.063                         | 82.98  |       |
|                 | 5997                    | Phyl   | 34.901           | 0.093            | 3.631                          | 0.440                          | 8.596  | 0.230 | 19.874 | 0.588  | 0.149             | 0.572 | 0.021            | 2.163           | 0.109                         | 71.37  |       |
|                 | 5998                    | Phyl   | 40.911           | 0.073            | 5.108                          | 0.444                          | 4.975  | 0.109 | 17.203 | 0.115  | 0.196             | 0.367 | 0.021            | 0.842           | 0.089                         | 70.45  |       |
|                 | 5999                    | Phyl   | 34.076           | 0.091            | 3.239                          | 0.436                          | 8.726  | 0.145 | 19.287 | 0.113  | 0.060             | 0.617 | 0.000            | 2.575           | 0.049                         | 69.41  |       |
|                 | 6000                    | Phyl   | 37.744           | 0.099            | 3.173                          | 0.566                          | 6.476  | 0.181 | 21.578 | 0.296  | 0.120             | 0.499 | 0.044            | 1.418           | 0.103                         | 72.30  |       |

<sup>a</sup> Detection limits of individual elements are shown in Nakamura et al.<sup>1</sup>.<sup>b</sup> Total wt% is normalized to 100, and TEM analysis spots are not shown in any figure.<sup>c</sup> Analysis spots are shown in supplementary figures.

Supplementary Table 2: Raw SIMS measured oxygen-isotope data of chondrule-like objects and CAIs in the Ryugu samples

| Analysis_#  | Sample                                                                          | $\delta^{18}\text{O}$ ‰<br>RAW | 2SE         | $\delta^{17}\text{O}$ ‰<br>RAW | 2SE         | $\Delta^{17}\text{O}$ ‰<br>RAW | 2SE         | $^{16}\text{O}$<br>(Mcps) | OH<br>correction<br>(‰) <sup>a</sup> | IMF <sup>b</sup> | IMF          | $\delta^{18}\text{O}$ ‰ | Error<br>(2SD) | $\delta^{17}\text{O}$ ‰ | Error<br>(2SD) | $\Delta^{17}\text{O}$ ‰ | Error<br>(2SD) |
|-------------|---------------------------------------------------------------------------------|--------------------------------|-------------|--------------------------------|-------------|--------------------------------|-------------|---------------------------|--------------------------------------|------------------|--------------|-------------------------|----------------|-------------------------|----------------|-------------------------|----------------|
| 20220424_52 | 3Hole_Disk_SCOI (San Carlos Olivine)                                            | 0.69                           | 2.68        | 0.75                           | 4.05        | 0.39                           | 4.28        | 0.32                      | 0.42                                 |                  |              |                         |                |                         |                |                         |                |
| 20220424_53 | 3Hole_Disk_SCOI                                                                 | 0.26                           | 2.02        | -0.43                          | 3.47        | -0.56                          | 3.63        | 0.32                      | 0.45                                 |                  |              |                         |                |                         |                |                         |                |
| 20220424_54 | 3Hole_Disk_SCOI                                                                 | 1.09                           | 2.69        | 8.90                           | 4.90        | 8.33                           | 5.10        | 0.32                      | 0.42                                 |                  |              |                         |                |                         |                |                         |                |
|             | <b>Average Standard &amp; 2SD for C0002-P5-C2-Chd &amp; C1-Chd/52-54, 61-63</b> | <b>0.78</b>                    | <b>1.96</b> | <b>1.64</b>                    | <b>7.91</b> | <b>1.24</b>                    | <b>8.47</b> |                           |                                      |                  | <b>-4.51</b> |                         |                |                         |                |                         |                |
| 20220424_57 | 3Hole_C0002-P5_C2_Chd spot1_OI                                                  | -44.96                         | 3.98        | -45.22                         | 5.94        | -21.84                         | 6.29        | 0.29                      | 0.34                                 | 0.22             | -4.30        | <b>-39.81</b>           | <b>1.96</b>    | <b>-43.63</b>           | <b>7.91</b>    | <b>-22.93</b>           | <b>8.47</b>    |
| 20220424_58 | 3Hole_C0002-P5_C2_Chd spot2_OI                                                  | -52.05                         | 1.73        | -48.85                         | 5.97        | -21.78                         | 6.04        | 0.28                      | 0.34                                 | 0.22             | -4.30        | <b>-47.49</b>           | <b>1.96</b>    | <b>-47.82</b>           | <b>7.91</b>    | <b>-23.13</b>           | <b>8.47</b>    |
| 20220424_59 | 3Hole_C0002-P5_C1_Chd spot1_OI                                                  | -1.52                          | 3.55        | -2.69                          | 6.33        | -1.90                          | 6.60        | 0.21                      | 0.53                                 | 0.22             | -4.30        | <b>2.56</b>             | <b>1.96</b>    | <b>-2.46</b>            | <b>7.91</b>    | <b>-3.79</b>            | <b>8.47</b>    |
| 20220424_60 | 3Hole_C0002-P5_C1_Chd spot2_OI                                                  | -5.99                          | 3.16        | -4.77                          | 6.23        | -1.65                          | 6.44        | 0.20                      | 0.30                                 | 0.22             | -4.30        | <b>-1.35</b>            | <b>1.96</b>    | <b>-3.73</b>            | <b>7.91</b>    | <b>-3.03</b>            | <b>8.47</b>    |
| 20220424_61 | 3Hole_Disk_right_SCOI                                                           | -0.52                          | 2.21        | 4.69                           | 4.60        | 4.96                           | 4.74        | 0.33                      | 0.37                                 |                  |              |                         |                |                         |                |                         |                |
| 20220424_62 | 3Hole_Disk_right_SCOI                                                           | 1.20                           | 2.36        | 1.24                           | 6.08        | 0.62                           | 6.21        | 0.32                      | 0.37                                 |                  |              |                         |                |                         |                |                         |                |
| 20220424_63 | 3Hole_Disk_right_SCOI                                                           | 1.90                           | 2.04        | -2.96                          | 5.00        | -3.94                          | 5.11        | 0.32                      | 0.38                                 |                  |              |                         |                |                         |                |                         |                |
| 20220424_95 | 7 hole_Disk, SC-OI                                                              | 4.18                           | 2.52        | 3.50                           | 5.86        | 1.33                           | 6.00        | 0.32                      | 0.16                                 |                  |              |                         |                |                         |                |                         |                |
| 20220424_96 | 7 hole_Disk, SC-OI                                                              | 4.58                           | 2.12        | 6.33                           | 3.81        | 3.94                           | 3.96        | 0.33                      | 0.15                                 |                  |              |                         |                |                         |                |                         |                |
| 20220424_97 | 7 hole_Disk, SC-OI                                                              | 1.29                           | 2.40        | 3.79                           | 5.76        | 3.12                           | 5.89        | 0.33                      | 0.15                                 |                  |              |                         |                |                         |                |                         |                |
|             | <b>Average Standard &amp; 2SD for C0040-02-CAI/95-97, 102-104 (N=6)</b>         | <b>1.81</b>                    | <b>2.43</b> | <b>2.09</b>                    | <b>4.81</b> | <b>1.15</b>                    | <b>4.05</b> |                           |                                      |                  | <b>-3.49</b> |                         |                |                         |                |                         |                |
| 20220424_98 | 7 hole_C0040-02-CAI spot1_Hib                                                   | -46.46                         | 2.61        | -49.21                         | 6.43        | -25.04                         | 6.57        | 0.23                      | 0.44                                 | -3.04            | -6.52        | <b>-39.11</b>           | <b>2.43</b>    | <b>-46.47</b>           | <b>4.81</b>    | <b>-26.13</b>           | <b>4.05</b>    |
| 20220424_99 | 7 hole_C0040-02-CAI spot2_Sp                                                    | -51.45                         | 2.80        | -46.45                         | 6.94        | -19.69                         | 7.09        | 0.23                      | 0.24                                 | -3.33            | -6.81        | <b>-43.14</b>           | <b>2.43</b>    | <b>-42.65</b>           | <b>4.81</b>    | <b>-20.22</b>           | <b>4.05</b>    |
| 20220424_10 | 7 hole_C0040-02-CAI spot3_Sp                                                    | -47.61                         | 3.12        | -44.67                         | 7.62        | -19.91                         | 7.79        | 0.22                      | 0.19                                 | -3.33            | -6.81        | <b>-42.49</b>           | <b>2.43</b>    | <b>-44.01</b>           | <b>4.81</b>    | <b>-21.92</b>           | <b>4.05</b>    |
| 20220424_10 | 7 hole_C0040-02-CAI spot4_Sp                                                    | -50.26                         | 3.31        | -46.74                         | 4.32        | -20.60                         | 4.65        | 0.23                      | 0.32                                 | -3.33            | -6.81        | <b>-43.09</b>           | <b>2.43</b>    | <b>-44.16</b>           | <b>4.81</b>    | <b>-21.75</b>           | <b>4.05</b>    |
| 20220424_10 | 7 hole_Disk, SC-OI                                                              | 1.57                           | 2.98        | 1.07                           | 5.49        | 0.25                           | 5.70        | 0.32                      | 0.18                                 |                  |              |                         |                |                         |                |                         |                |
| 20220424_10 | 7 hole_Disk, SC-OI                                                              | 0.63                           | 1.85        | -1.48                          | 4.32        | -1.81                          | 4.43        | 0.34                      | 0.16                                 |                  |              |                         |                |                         |                |                         |                |
| 20220424_10 | 7 hole_Disk, SC-OI                                                              | 0.98                           | 2.02        | 2.67                           | 4.06        | 2.16                           | 4.20        | 0.33                      | 0.15                                 |                  |              |                         |                |                         |                |                         |                |
|             | <b>Average Standard &amp; 2SD for C0040-02-Chd &amp; C0076-10-CAI/102-104,</b>  | <b>1.33</b>                    | <b>1.33</b> | <b>2.20</b>                    | <b>5.39</b> | <b>1.51</b>                    | <b>5.15</b> |                           |                                      |                  | <b>-3.97</b> |                         |                |                         |                |                         |                |
| 20220424_10 | 7 hole_C0040-02-Chd spot1_OI                                                    | -48.28                         | 2.52        | -46.57                         | 4.98        | -21.46                         | 5.15        | 0.29                      | 0.11                                 | 0.22             | -3.75        | <b>-44.39</b>           | <b>1.33</b>    | <b>-46.02</b>           | <b>5.39</b>    | <b>-22.94</b>           | <b>5.15</b>    |
| 20220424_10 | 7 hole_C0076-10-CAI spot1_Sp                                                    | -51.65                         | 2.34        | -48.95                         | 7.65        | -22.09                         | 7.74        | 0.23                      | 0.16                                 | -3.33            | -7.29        | <b>-43.96</b>           | <b>1.33</b>    | <b>-46.27</b>           | <b>5.39</b>    | <b>-23.41</b>           | <b>5.15</b>    |
| 20220424_10 | 7 hole_C0076-10-CAI spot2_Sp                                                    | -47.04                         | 3.37        | -47.72                         | 6.44        | -23.26                         | 6.68        | 0.24                      | 0.17                                 | -3.33            | -7.29        | <b>-40.26</b>           | <b>1.33</b>    | <b>-45.99</b>           | <b>5.39</b>    | <b>-25.06</b>           | <b>5.15</b>    |
| 20220424_10 | 7 hole_Disk, SC-OI                                                              | 1.37                           | 1.88        | 6.62                           | 5.22        | 5.91                           | 5.31        | 0.35                      | 0.14                                 |                  |              |                         |                |                         |                |                         |                |
| 20220424_10 | 7 hole_Disk, SC-OI                                                              | 1.84                           | 3.17        | 2.18                           | 6.19        | 1.22                           | 6.40        | 0.34                      | 0.13                                 |                  |              |                         |                |                         |                |                         |                |
| 20220424_11 | 7 hole_Disk, SC-OI                                                              | 2.29                           | 2.27        | 3.75                           | 4.45        | 2.56                           | 4.61        | 0.35                      | 0.13                                 |                  |              |                         |                |                         |                |                         |                |

<sup>a</sup>OH correction (‰) =  $^{16}\text{O}^1\text{H}^- \text{intensity} / [^{17}\text{O}^- \text{intensity} \times (^{17}\text{O}^- \text{tail} / ^{17}\text{O}^- \text{intensity})] \times 1000$ ;  $^{17}\text{O}^- \text{tail} / ^{17}\text{O}^- \text{intensity} = 2.1 \times 10^{-5}$ .

<sup>b</sup>Correction for instrumental bias using standards that have similar chemical compositions to the target phases.

Supplementary Table 3: The instrumental bias relative to SCOl (San Carlos Olivine) among different standards.

| Standard name       | Mineral  | Standard                                        |      |                                    |      |                                                 | SCOl (bracketing analyses)       |      |                                    |                                  | Bias relative to laser Fluorination |       |      |           |
|---------------------|----------|-------------------------------------------------|------|------------------------------------|------|-------------------------------------------------|----------------------------------|------|------------------------------------|----------------------------------|-------------------------------------|-------|------|-----------|
|                     |          | $\delta^{18}\text{O} \pm 2\text{SD} (\text{‰})$ |      | Bias $\pm 2\text{SE} (\text{‰})^a$ | N    | $\delta^{18}\text{O} \pm 2\text{SD} (\text{‰})$ | Bias $\pm 2\text{SE} (\text{‰})$ | N    | SCOl $\pm 2\text{SE} (\text{‰})^b$ | $\delta^{18}\text{O} (\text{‰})$ | Ref                                 |       |      |           |
| HN-Ol               | For100   | 4.85                                            | 2.31 | -4.02                              | 1.16 | 4                                               | 1.06                             | 4.12 | -4.24                              | 1.46                             | 8                                   | 0.22  | 1.86 | 8.90 [2]  |
| Spinel#1            | Spinel   | 10.87                                           | 2.72 | -6.20                              | 1.36 | 4                                               | 2.42                             | 1.03 | -2.88                              | 0.37                             | 8                                   | -3.33 | 1.41 | 17.18 [3] |
| Madagascar hibonite | Hibonite | 4.85                                            | 0.99 | -5.91                              | 0.49 | 4                                               | 2.42                             | 1.03 | -2.88                              | 0.37                             | 8                                   | -3.04 | 0.61 | 10.83 [3] |

<sup>a</sup>Instrumental bias in  $\delta^{18}\text{O}$  from  $\delta^{18}\text{O}$  values determined by laser fluorination.

<sup>b</sup>Correction factors of instrumental bias caused by chemical compositions of the chondrule-like objects and CAIs (matrix effect).

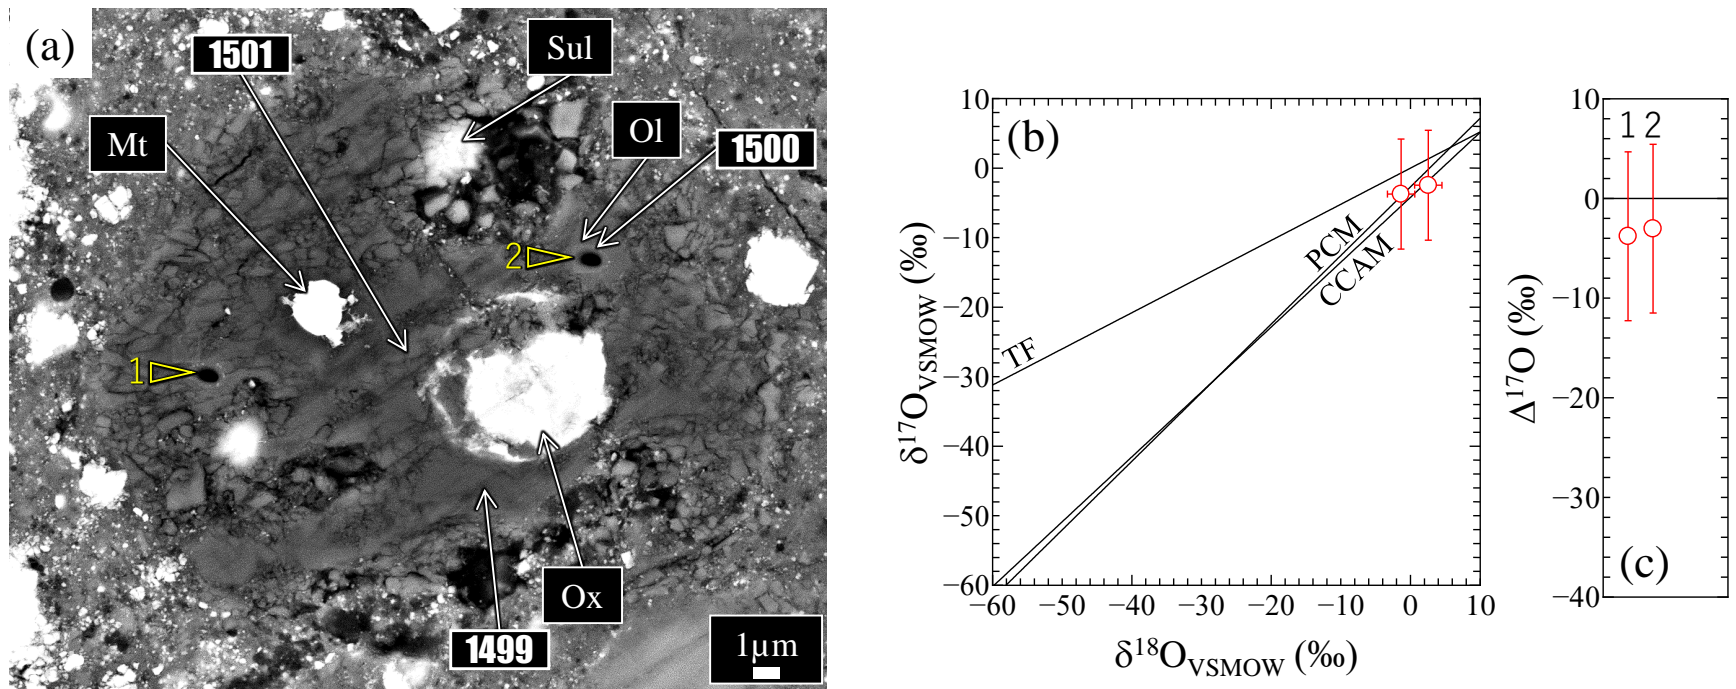

**Supplementary Fig. 1:** The BSE image of C0002-P5-C1-Chd (a), oxygen three-isotope ratios of C0002-P5-C1-Chd (b), and  $\Delta^{17}\text{O}$  values of C0002-P5-C1-Chd (c). Four-digit numbers in panel a correspond to analysis numbers of FE-EPMA (Supplementary table 1). Abbreviations in panel a: Ol, olivine; Mt, Fe-Ni metal; Sul, Fe-sulfide; Ox, oxide. TF, PCM, and CCAM in panel b represent the Terrestrial Fractionation line, the Primitive Chondrule Mineral line<sup>4</sup>, and the Carbonaceous Chondrite Anhydrous Mineral line<sup>5</sup>. Numbers in panel c correspond to analysis numbers of SIMS (Supplementary table 2).

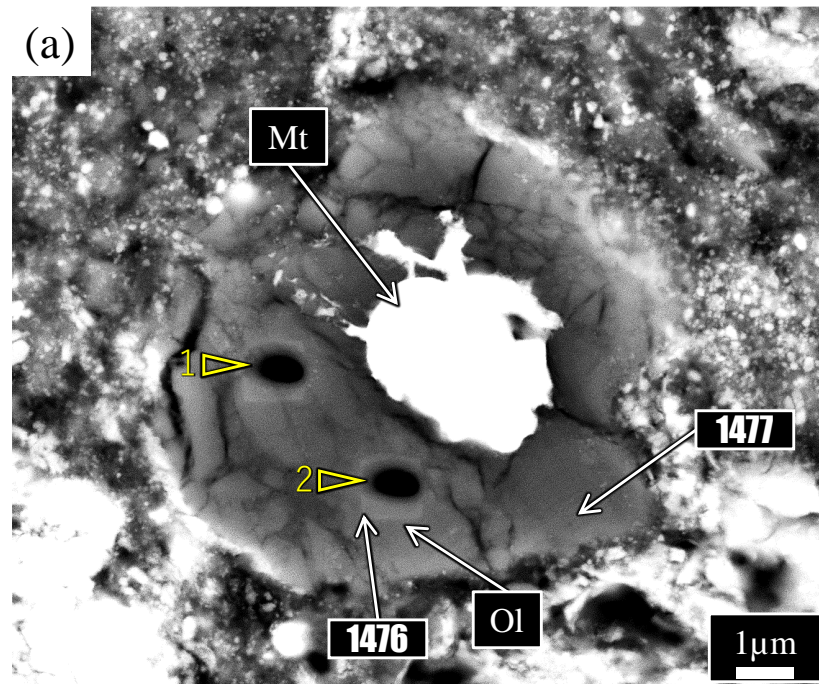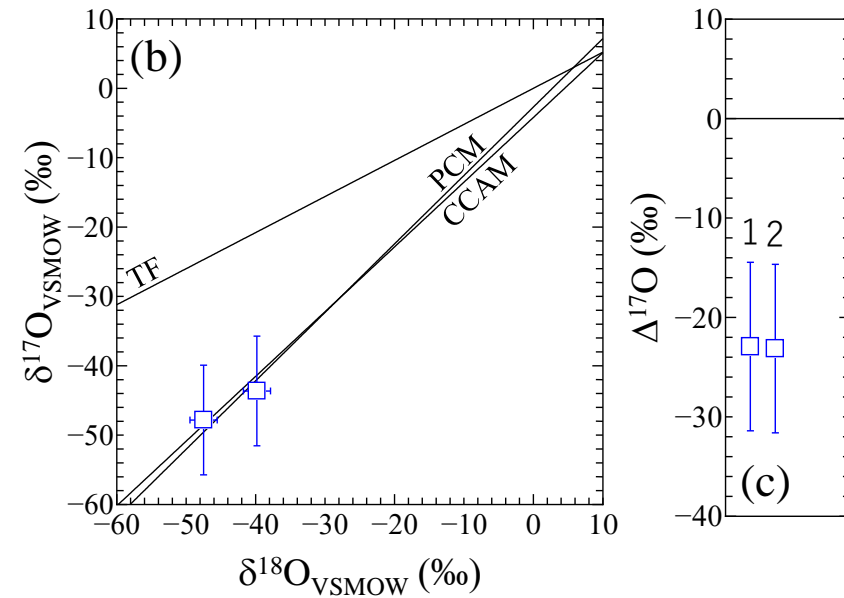

**Supplementary Fig. 2:** The BSE image of C0002-P5-C2-Chd (a), oxygen three-isotope ratios of C0002-P5-C2-Chd (b), and  $\Delta^{17}\text{O}$  values of C0002-P5-C2-Chd (c). Four-digit numbers in panel a correspond to analysis numbers of FE-EPMA (Supplementary table 1). Abbreviations in panel a: Ol, olivine; Mt, Fe-Ni metal. TF, PCM, and CCAM in panel b represent the Terrestrial Fractionation line, the Primitive Chondrule Mineral line<sup>4</sup>, and the Carbonaceous Chondrite Anhydrous Mineral line<sup>5</sup>. Numbers in panel c correspond to analysis numbers of SIMS (Supplementary table 2).

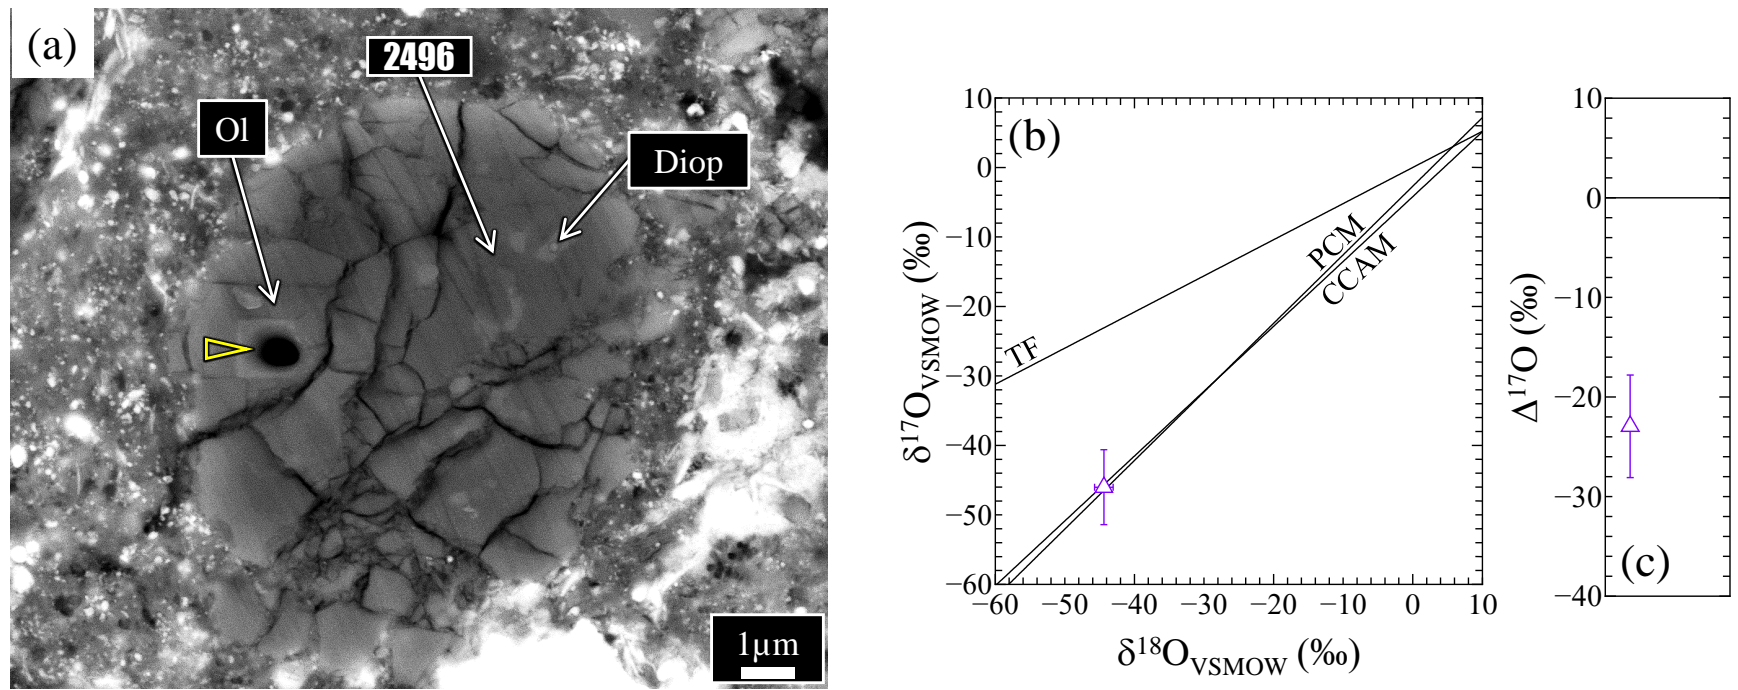

**Supplementary Fig. 3:** The BSE image of C0040-02-Chd (a), oxygen three-isotope ratios of C0040-02-Chd (b), and  $\Delta^{17}\text{O}$  value of C0040-02-Chd (c). The four-digit number in panel a corresponds to the analysis number of FE-EPMA (Supplementary table 1). Abbreviations in panel a: Ol, olivine; Diop, diopside. TF, PCM, and CCAM in panel b represent the Terrestrial Fractionation line, the Primitive Chondrule Mineral line<sup>4</sup>, and the Carbonaceous Chondrite Anhydrous Mineral line<sup>5</sup>.

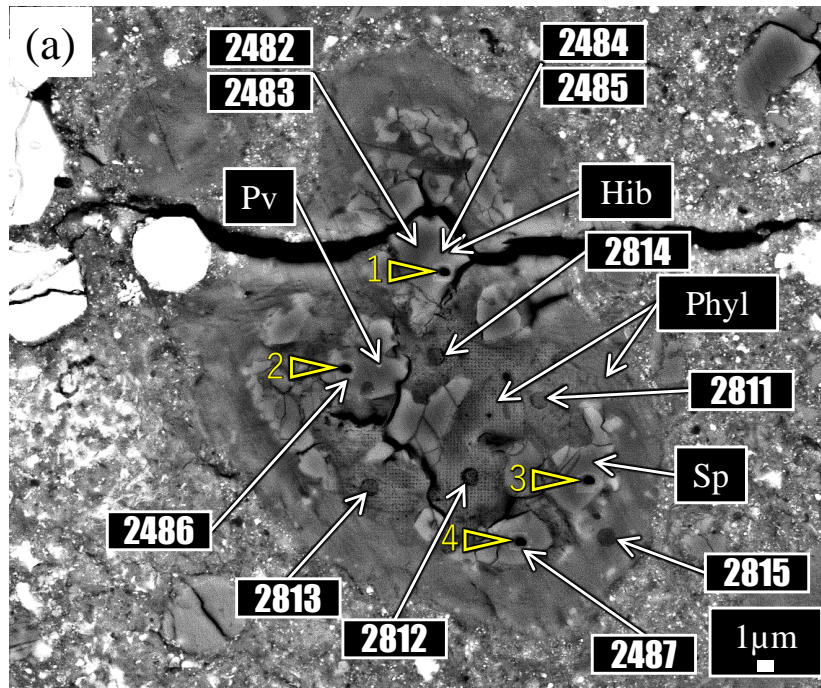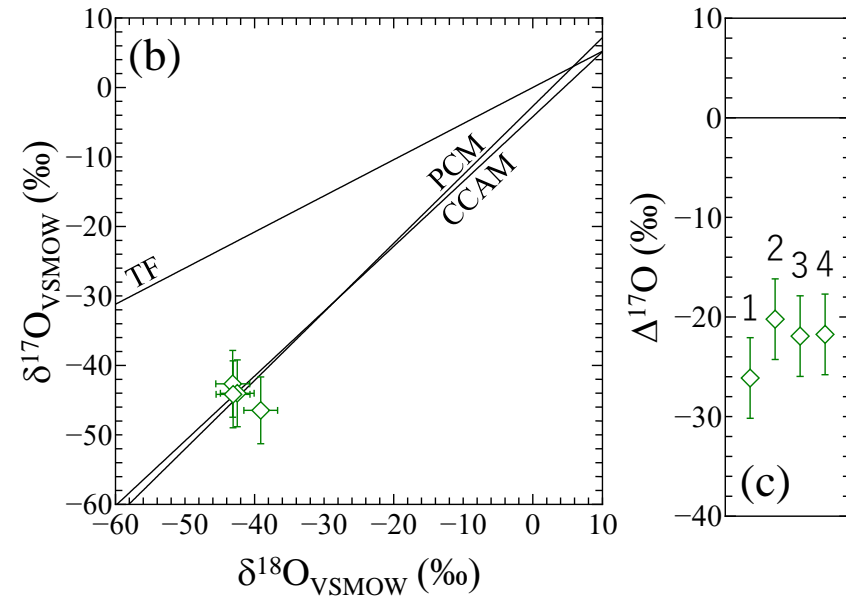

**Supplementary Fig. 4:** The BSE image of C0040-02-CAI (a), oxygen three-isotope ratios of C0040-02-CAI (b), and  $\Delta^{17}\text{O}$  values of C0040-02-CAI (c). Four-digit numbers in panel a correspond to analysis numbers of FE-EPMA (Supplementary table 1). Abbreviations: Sp, spinel; Hib, hibonite; Pv, perovskite; Phyl, phyllosilicates. TF, PCM, and CCAM in panel b represent the Terrestrial Fractionation line, the Primitive Chondrule Mineral line<sup>4</sup>, and the Carbonaceous Chondrite Anhydrous Mineral line<sup>5</sup>. Numbers in panel c correspond to analysis numbers of SIMS (Supplementary table 2).

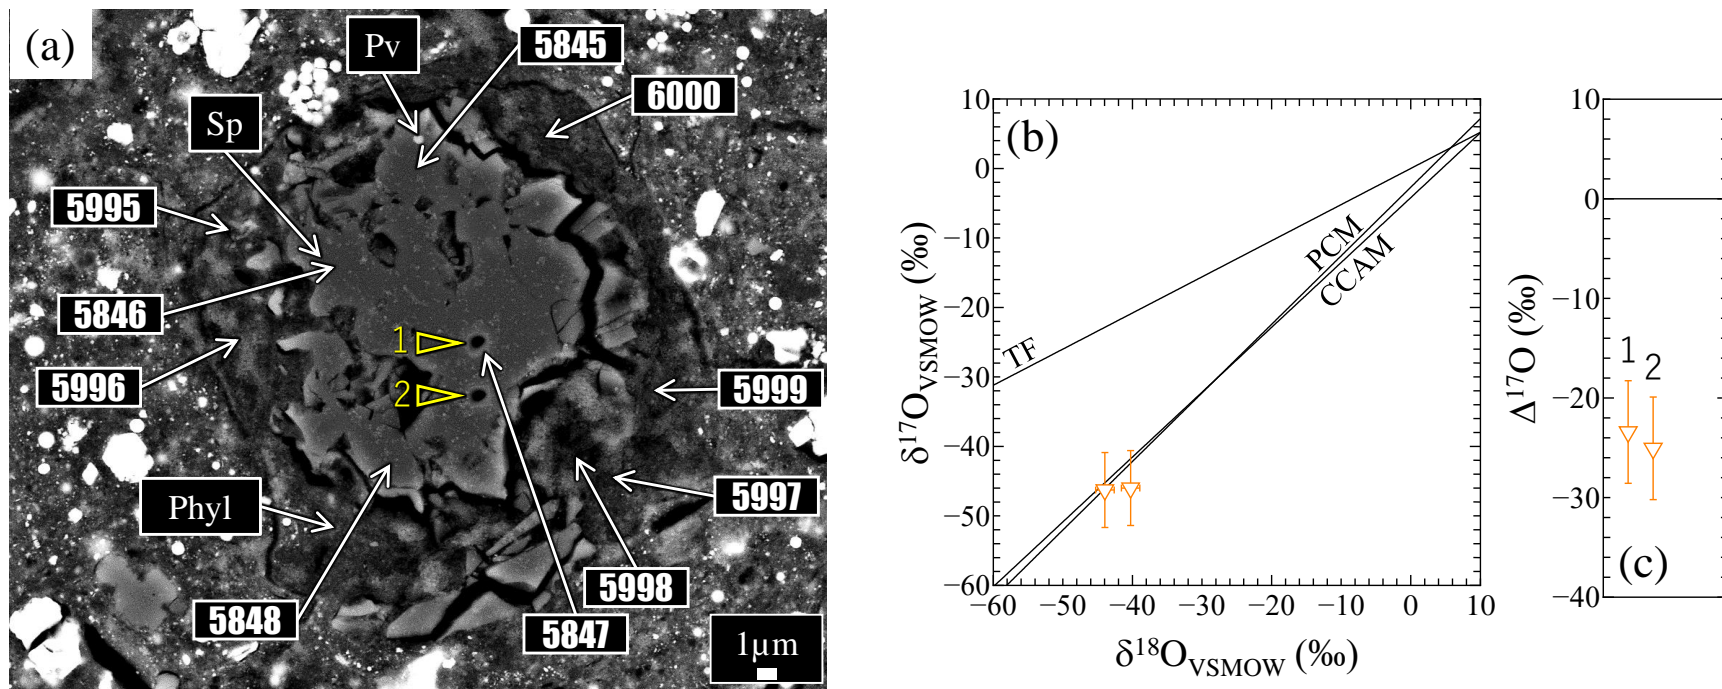

**Supplementary Fig. 5:** The BSE image of C0076-10-CAI (a), oxygen three-isotope ratios of C0076-10-CAI (b), and  $\Delta^{17}\text{O}$  values of C0076-10-CAI (c). Four-digit numbers in panel a correspond to analysis numbers of FE-EPMA (Supplementary table 1). Abbreviations: Sp, spinel; Pv, perovskite; Phyl, phyllosilicates. TF, PCM, and CCAM in panel b represent the Terrestrial Fractionation line, the Primitive Chondrule Mineral line<sup>4</sup>, and the Carbonaceous Chondrite Anhydrous Mineral line<sup>5</sup>. Numbers in panel c correspond to analysis numbers of SIMS (Supplementary table 2).



### Supplementary reference

1. Nakamura, T. et al. Formation and evolution of Cb-type asteroid Ryugu: Direct evidence from returned samples. *Science* 10.1126/science.abn8671 (2022).
2. Kita, N. T. et al. High precision SIMS oxygen three isotope study of chondrules in LL3 chondrites: Role of ambient gas during chondrule formation. *Geochim. Cosmochim. Acta* **74**, 6610-6635 (2010).
3. Ushikubo, T., Tenner, T. J., Hiyagon, H., & Kita, N. T. A long duration of the  $^{16}\text{O}$ -rich reservoir in the solar nebula, as recorded in fine-grained refractory inclusions from the least metamorphosed carbonaceous chondrites. *Geochim. Cosmochim. Acta* **201**, 103-122 (2017).
4. Ushikubo, T., Kimura, M., Kita, N. T., & Valley, J.W. Primordial oxygen isotope reservoirs of the solar nebula recorded in chondrules in Acfer 094 carbonaceous chondrite. *Geochim. Cosmochim. Acta* **90**, 242–264 (2012).
5. Clayton, R. N., Onuma, N., Grossman, L. & Mayeda, T. K. Distribution of the pre-solar component in Allende and other carbonaceous chondrites. *Earth Planet. Sci. Lett.* **34**, 209–224 (1977).
